# Supplementary material
Source: publisher figshare collection journal article supplement (https://wiley.figshare.com/articles/dataset/_/6203456)
Supplement: Supplementary file 1 [file 1]

## Online Appendix A. Proof of Theorem 1

To prove Theorem 1, we assume that  $w_i(t; \alpha)$  is a function of  $(\Delta_i, T_i, \bar{A}_i, V_i, \bar{L}_i)$  for each  $i = 1, \dots, n$  and  $(\hat{\beta}', \hat{\alpha}', \hat{\alpha}^c)'$  as well as  $S_w^{(0)}(t; \beta, \alpha)$ ,  $S_w^{(1)}(t; \beta, \alpha)$ ,  $S_w^{(0)}(t; \hat{\beta}, \hat{\alpha})$ ,  $S_w^{(1)}(t; \hat{\beta}, \hat{\alpha})$  and  $w_i(t; \hat{\alpha})$  are functions of the random variables  $(\Delta_i, T_i, \bar{A}_i, V_i, \bar{L}_i)_{i=1}^n$ . We will denote with  $Y_i(t) = 1 - C_i(t)$ , if an individual is still under observation. We further assume the following regularity conditions:

(A)  $\int_0^\infty \tilde{\lambda}_0(t) dt < \infty$

(B) There exists a neighborhood  $U$  of  $(\beta', \alpha')'$  such that for each  $j = 0, 1, 2$ :

$$\sup_{t \in (0, \infty), (\beta^*, \alpha^*) \in U} \|S_w^{(j)}(t; \beta^*, \alpha^*) - s_w^{(j)}(t; \beta^*, \alpha^*)\| \xrightarrow{P} 0$$

(C) There exists a neighborhood  $U$  of  $(\beta', \alpha')'$  such that for  $(\beta^{*'}, \alpha^{*'})' \in U$  and  $t \in (0, \infty)$ :

$$\nabla_\beta s_w^{(0)}(t; \beta^*, \alpha^*) = s_w^{(1)}(t; \beta^*, \alpha^*),$$

$$\nabla_\beta s_w^{(1)}(t; \beta^*, \alpha^*)' = s_w^{(2)}(t; \beta^*, \alpha^*),$$

$s_w^{(0)}(t; \beta^*, \alpha^*)$ ,  $s_w^{(1)}(t; \beta^*, \alpha^*)$ ,  $s_w^{(2)}(t; \beta^*, \alpha^*)$  are continuous functions of  $(\beta^{*'}, \alpha^{*'})' \in U$ , uniformly in  $t \in (0, \infty)$ ,  $s_w^{(0)}$ ,  $s_w^{(1)}$  and  $s_w^{(2)}$  are bounded on  $U \times (0, \infty)$  and  $s_w^{(0)}$  is bounded away from zero on  $U \times (0, \infty)$ ,

(D) There exists a neighborhood  $U$  of  $(\beta', \alpha')'$  such that for all  $(\beta^{*'}, \alpha^{*'})' \in U$ :

–  $\mathbb{E}(\nabla_{\alpha^{(a)}} u_{w,1}(\beta^*, \alpha^*)')$ ,  $\mathbb{E}(u_{\alpha^{(a)},1}(\alpha^{a*})u_{\alpha^{(a)},1}(\alpha^{a*})')$ ,  $\mathbb{E}(\nabla_{\alpha^{(c)}} u_{w,i}(\beta^*, \alpha^*)')$  and  $\mathbb{E}(u_{\alpha^{(c)},1}(\alpha^{c*})u_{\alpha^{(c)},1}(\alpha^{c*})')$  exist and  $\nabla_{\alpha^{(a)}} \mathbb{E}(\nabla_{\alpha^{(a)}} u_{w,1}(\beta^*, \alpha^*)')$ ,  $\nabla_{\alpha^{(a)}} \mathbb{E}(u_{\alpha^{(a)},1}(\alpha^{a*})u_{\alpha^{(a)},1}(\alpha^{a*})')$ ,  $\nabla_{\alpha^{(c)}} \mathbb{E}(\nabla_{\alpha^{(c)}} u_{w,i}(\beta^*, \alpha^*)')$  and  $\nabla_{\alpha^{(c)}} \mathbb{E}(u_{\alpha^{(c)},1}(\alpha^{c*})u_{\alpha^{(c)},1}(\alpha^{c*})')$  are bounded.

–  $\frac{1}{n} \nabla_{\alpha^{(a)}} U_{\alpha^{(a)}}(\alpha^{a*})'$ ,  $\frac{1}{n} \nabla_{\alpha^{(c)}} U_{\alpha^{(c)}}(\alpha^{c*})'$ ,  $\frac{1}{n} \nabla_{\alpha^{(a)}} U_w(\beta^*, \alpha^{a*}, \alpha^{c*})'$  and  $\frac{1}{n} \nabla_{\alpha^{(c)}} U_w(\beta^*, \alpha^{a*}, \alpha^{c*})'$  exist and  $\frac{1}{n} \nabla_{\alpha^{(a)}} (\nabla_{\alpha^{(a)}} U_{\alpha^{(a)}}(\alpha^{a*})')$ ,  $\frac{1}{n} \nabla_{\alpha^{(c)}} (\nabla_{\alpha^{(c)}} U_{\alpha^{(c)}}(\alpha^{c*})')$ ,  $\frac{1}{n} \nabla_{\alpha^{(a)}} (\nabla_{\alpha^{(a)}} U_w(\beta^*, \alpha^{a*}, \alpha^{c*})')$  and  $\frac{1}{n} \nabla_{\alpha^{(c)}} (\nabla_{\alpha^{(c)}} U_w(\beta^*, \alpha^{a*}, \alpha^{c*})')$  are bounded.

(E) Differentiation with respect to  $\alpha^{(a)}$  and  $\alpha^{(c)}$  is exchangeable with integration as follows:

$$\begin{aligned} \nabla_{\alpha^{(a)}} \mathbb{E}(u_{w,i}(\beta, \alpha^{(a)}, \alpha^{(c)})') &= \int \nabla_{\alpha^{(a)}} (u_{w,i}(\beta, \alpha^{(a)}, \alpha^{(c)})' f(\delta_i, t_i, \bar{a}_i, v_i, \bar{l}_i)) d(\delta_i, t_i, \bar{a}_i, v_i, \bar{l}_i) \\ \nabla_{\alpha^{(c)}} \mathbb{E}(u_{w,i}(\beta, \alpha^{(a)}, \alpha^{(c)})') &= \int \nabla_{\alpha^{(c)}} (u_{w,i}(\beta, \alpha^{(a)}, \alpha^{(c)})' f(\delta_i, t_i, \bar{a}_i, v_i, \bar{l}_i)) d(\delta_i, t_i, \bar{a}_i, v_i, \bar{l}_i) \\ \nabla_{\alpha^{(a)}} \mathbb{E}(u_{\alpha^{(a)},i}(\alpha^{(a)})') &= \int \nabla_{\alpha^{(a)}} (u_{\alpha^{(a)},i}(\alpha^{(a)})' f(\delta_i, t_i, \bar{a}_i, v_i, \bar{l}_i)) d(\delta_i, t_i, \bar{a}_i, v_i, \bar{l}_i) \\ \nabla_{\alpha^{(c)}} \mathbb{E}(u_{\alpha^{(c)},i}(\alpha^{(c)})') &= \int \nabla_{\alpha^{(c)}} (u_{\alpha^{(c)},i}(\alpha^{(c)})' f(\delta_i, t_i, \bar{a}_i, v_i, \bar{l}_i)) d(\delta_i, t_i, \bar{a}_i, v_i, \bar{l}_i) \end{aligned}$$

*Proof.*

The proof is based on the proof of Ali et al. [1] of the variance formula for known IPT weights and the proof of Robins et al. [2] of the variance of estimators resulting from IPC weighted generalized estimating equations.

We set  $\eta = (\beta, \alpha^{(a)}, \alpha^{(c)})$  and rewrite  $U(\eta) = (U_w(\beta, \alpha^{(a)}, \alpha^{(c)})', U_{\alpha^{(a)}}(\alpha^{(a)})', U_{\alpha^{(c)}}(\alpha^{(c)})')'$ . Applying the mean value

theorem yields

$$0 = U(\hat{\eta}) = U(\eta) + (\nabla_{\eta} U(\eta^*))' (\hat{\eta} - \eta) \quad (\text{A1})$$

with  $\eta^* = (\beta^*, \alpha^{a*}, \alpha^{c*})$  on the line segment between  $\hat{\eta}$  and  $\eta$ . Since  $\nabla_{\beta} U_w(\beta^*, \alpha^{a*}, \alpha^{c*})'$ ,  $\nabla_{\alpha^{(a)}} U_{\alpha^{(a)}}(\alpha^{a*})'$  and  $\nabla_{\alpha^{(c)}} U_{\alpha^{(c)}}(\alpha^{c*})'$  are symmetric matrices, it follows that

$$(\nabla_{\eta} U(\eta^*))' = \begin{pmatrix} \nabla_{\beta} U_w(\beta^*, \alpha^{a*}, \alpha^{c*})' & (\nabla_{\alpha^{(a)}} U_w(\beta^*, \alpha^{a*}, \alpha^{c*})')' & (\nabla_{\alpha^{(c)}} U_w(\beta^*, \alpha^{a*}, \alpha^{c*})')' \\ 0 & \nabla_{\alpha^{(a)}} U_{\alpha^{(a)}}(\alpha^{a*})' & 0 \\ 0 & 0 & \nabla_{\alpha^{(c)}} U_{\alpha^{(c)}}(\alpha^{c*})' \end{pmatrix}.$$

Equation (A1) is then equivalent to

$$\begin{aligned} 0 &= U_w(\beta, \alpha^{(a)}, \alpha^{(c)}) + \nabla_{\beta} U_w(\beta^*, \alpha^{a*}, \alpha^{c*})'(\hat{\beta} - \beta) + (\nabla_{\alpha^{(a)}} U_w(\beta^*, \alpha^{a*}, \alpha^{c*})')'(\hat{\alpha}^{(a)} - \alpha^{(a)}) \\ &\quad + (\nabla_{\alpha^{(c)}} U_w(\beta^*, \alpha^{a*}, \alpha^{c*})')'(\hat{\alpha}^{(c)} - \alpha^{(c)}), \\ 0 &= U_{\alpha^{(a)}}(\alpha^{(a)}) + \nabla_{\alpha^{(a)}} U_{\alpha^{(a)}}(\alpha^{a*})'(\hat{\alpha}^{(a)} - \alpha^{(a)}) \text{ and} \\ 0 &= U_{\alpha^{(c)}}(\alpha^{(c)}) + \nabla_{\alpha^{(c)}} U_{\alpha^{(c)}}(\alpha^{c*})'(\hat{\alpha}^{(c)} - \alpha^{(c)}) \end{aligned}$$

which can be rewritten as

$$\begin{aligned} \hat{\beta} - \beta &= -(\nabla_{\beta} U_w(\beta^*, \alpha^{a*}, \alpha^{c*})')^{-1} U_w(\beta, \alpha^{(a)}, \alpha^{(c)}) \\ &\quad - (\nabla_{\beta} U_w(\beta^*, \alpha^{a*}, \alpha^{c*})')^{-1} (\nabla_{\alpha^{(a)}} U_w(\beta^*, \alpha^{a*}, \alpha^{c*})')'(\hat{\alpha}^{(a)} - \alpha^{(a)}) \\ &\quad - (\nabla_{\beta} U_w(\beta^*, \alpha^{a*}, \alpha^{c*})')^{-1} (\nabla_{\alpha^{(c)}} U_w(\beta^*, \alpha^{a*}, \alpha^{c*})')'(\hat{\alpha}^{(c)} - \alpha^{(c)}), \\ \hat{\alpha}^{(a)} - \alpha^{(a)} &= -(\nabla_{\alpha^{(a)}} U_{\alpha^{(a)}}(\alpha^{a*})')^{-1} U_{\alpha^{(a)}}(\alpha^{(a)}) \text{ and} \\ \hat{\alpha}^{(c)} - \alpha^{(c)} &= -(\nabla_{\alpha^{(c)}} U_{\alpha^{(c)}}(\alpha^{c*})')^{-1} U_{\alpha^{(c)}}(\alpha^{(c)}), \end{aligned}$$

respectively. Inserting the last two equations into the first one and multiplying by  $\sqrt{n}$  leads to

$$\begin{aligned} \sqrt{n}(\hat{\beta} - \beta) &= \left( \frac{1}{n} \nabla_{\beta} U_w(\beta^*, \alpha^{a*}, \alpha^{c*})' \right)^{-1} \left( -\frac{1}{\sqrt{n}} U_w(\beta, \alpha^{(a)}, \alpha^{(c)}) + \right. \\ &\quad \left. \frac{1}{n} (\nabla_{\alpha^{(a)}} U_w(\beta^*, \alpha^{a*}, \alpha^{c*})')' \left( \frac{1}{n} \nabla_{\alpha^{(a)}} U_{\alpha^{(a)}}(\alpha^{a*})' \right)^{-1} \frac{1}{\sqrt{n}} U_{\alpha^{(a)}}(\alpha^{(a)}) + \right. \\ &\quad \left. \frac{1}{n} (\nabla_{\alpha^{(c)}} U_w(\beta^*, \alpha^{a*}, \alpha^{c*})')' \left( \frac{1}{n} \nabla_{\alpha^{(c)}} U_{\alpha^{(c)}}(\alpha^{c*})' \right)^{-1} \frac{1}{\sqrt{n}} U_{\alpha^{(c)}}(\alpha^{(c)}) \right). \end{aligned} \quad (\text{A2})$$

Using the same arguments as in Lin et al. [3] and the definition of  $\tilde{U}_w(\beta, \alpha^{(a)}, \alpha^{(c)})$  in (13), we may replace  $\frac{1}{\sqrt{n}} U_w(\beta, \alpha^{(a)}, \alpha^{(c)})$  by  $\frac{1}{\sqrt{n}} \tilde{U}_w(\beta, \alpha^{(a)}, \alpha^{(c)}) + o_p(1)$ , with  $o_p(1)$  denoting a random variable converging to zero in probability. Analogously to Andersen and Gill [4], using regularity assumptions (A)-(C),  $\left( \frac{1}{n} \nabla_{\beta} U_w(\beta^*, \alpha^{a*}, \alpha^{c*})' \right)$  converges in probability to  $H_{\beta\beta}$ . By the law of large numbers and regularity assumption (D),  $\left( \frac{1}{n} \nabla_{\alpha^{(a)}} U_{\alpha^{(a)}}(\alpha^{a*})' \right)$  converges in probability to  $H_{\alpha^{(a)}\alpha^{(a)}} = \mathbb{E}(\nabla_{\alpha^{(a)}} u_{1,\alpha^{(a)}}(\alpha^{(a)})')$ ,  $\left( \frac{1}{n} \nabla_{\alpha^{(c)}} U_{\alpha^{(c)}}(\alpha^{c*})' \right)$  converges in probability to  $H_{\alpha^{(c)}\alpha^{(c)}} = \mathbb{E}(\nabla_{\alpha^{(c)}} u_{1,\alpha^{(c)}}(\alpha^{(c)})')$ ,  $\frac{1}{n} (\nabla_{\alpha^{(a)}} U_w(\beta^*, \alpha^{a*}, \alpha^{c*})')'$  converges in probability to  $H_{\beta\alpha^a}$  and  $\frac{1}{n} (\nabla_{\alpha^{(c)}} U_w(\beta^*, \alpha^{a*}, \alpha^{c*})')'$

converges in probability to  $H_{\beta\alpha^{(c)}}$ . Then, (A2) can be rewritten as

$$\begin{aligned}\sqrt{n}(\hat{\beta} - \beta) &= H_{\beta\beta}^{-1} \left( -\frac{1}{\sqrt{n}} \tilde{U}_w(\beta, \alpha^{(a)}, \alpha^{(c)}) + H_{\beta\alpha^{(a)}} H_{\alpha^{(a)}\alpha^{(a)}}^{-1} \frac{1}{\sqrt{n}} U_{\alpha^{(a)}}(\alpha^{(a)}) + H_{\beta\alpha^{(c)}} H_{\alpha^{(c)}\alpha^{(c)}}^{-1} \frac{1}{\sqrt{n}} U_{\alpha^{(c)}}(\alpha^{(c)}) \right) + o_p(1) \\ &= H_{\beta\beta}^{-1} \frac{1}{\sqrt{n}} \left( \sum_{i=1}^n -\tilde{u}_{w,i}(\beta, \alpha^{(a)}, \alpha^{(c)}) + H_{\beta\alpha^{(a)}} H_{\alpha^{(a)}\alpha^{(a)}}^{-1} u_{\alpha^{(a)},i}(\alpha^{(a)}) + H_{\beta\alpha^{(c)}} H_{\alpha^{(c)}\alpha^{(c)}}^{-1} u_{\alpha^{(c)},i}(\alpha^{(c)}) \right) + o_p(1).\end{aligned}$$

Due to the central limit theorem, it holds that

$$\frac{1}{\sqrt{n}} \sum_{i=1}^n -\tilde{u}_{w,i}(\beta, \alpha^{(a)}, \alpha^{(c)}) + H_{\beta\alpha^{(a)}} H_{\alpha^{(a)}\alpha^{(a)}}^{-1} u_{\alpha^{(a)},i}(\alpha^{(a)}) + H_{\beta\alpha^{(c)}} H_{\alpha^{(c)}\alpha^{(c)}}^{-1} u_{\alpha^{(c)},i}(\alpha^{(c)})$$

converges in distribution to a mean zero Gaussian variable  $B$  with variance

$$\begin{aligned}Var(B) &= \mathbb{E} \left( \left( -\tilde{u}_{w,1}(\beta, \alpha^{(a)}, \alpha^{(c)}) + H_{\beta\alpha^{(a)}} H_{\alpha^{(a)}\alpha^{(a)}}^{-1} u_{\alpha^{(a)},1}(\alpha^{(a)}) + H_{\beta\alpha^{(c)}} H_{\alpha^{(c)}\alpha^{(c)}}^{-1} u_{\alpha^{(c)},1}(\alpha^{(c)}) \right)^{\otimes 2} \right) \\ &= \mathbb{E} \left( \tilde{u}_{w,1}(\beta, \alpha^{(a)}, \alpha^{(c)}) \tilde{u}_{w,1}(\beta, \alpha^{(a)}, \alpha^{(c)})' \right) \\ &\quad + H_{\beta\alpha^{(a)}} H_{\alpha^{(a)}\alpha^{(a)}}^{-1} \mathbb{E} \left( u_{\alpha^{(a)},1}(\alpha^{(a)}) u_{\alpha^{(a)},1}(\alpha^{(a)})' \right) H_{\alpha^{(a)}\alpha^{(a)}}^{-1} H'_{\beta\alpha^{(a)}} \\ &\quad + H_{\beta\alpha^{(c)}} H_{\alpha^{(c)}\alpha^{(c)}}^{-1} \mathbb{E} \left( u_{\alpha^{(c)},1}(\alpha^{(c)}) u_{\alpha^{(c)},1}(\alpha^{(c)})' \right) H_{\alpha^{(c)}\alpha^{(c)}}^{-1} H'_{\beta\alpha^{(c)}} \\ &\quad - 2\mathbb{E} \left( \tilde{u}_{w,1}(\beta, \alpha^{(a)}, \alpha^{(c)}) u_{\alpha^{(a)},1}(\alpha^{(a)})' \right) H_{\alpha^{(a)}\alpha^{(a)}}^{-1} H'_{\beta\alpha^{(a)}} \\ &\quad - 2\mathbb{E} \left( \tilde{u}_{w,1}(\beta, \alpha^{(a)}, \alpha^{(c)}) u_{\alpha^{(c)},1}(\alpha^{(c)})' \right) H_{\alpha^{(c)}\alpha^{(c)}}^{-1} H'_{\beta\alpha^{(c)}} \\ &\quad + 2H_{\beta\alpha^{(a)}} H_{\alpha^{(a)}\alpha^{(a)}}^{-1} \mathbb{E} \left( u_{\alpha^{(a)},1}(\alpha^{(a)}) u_{\alpha^{(c)},1}(\alpha^{(c)})' \right) H_{\alpha^{(c)}\alpha^{(c)}}^{-1} H'_{\beta\alpha^{(c)}},\end{aligned} \tag{A3}$$

whereby we use the standard notation  $v^{\otimes 2} = vv'$ . Thus, to prove the theorem, it remains to show that

$$Var(B) = F_{\beta} - H_{\beta\alpha^{(a)}} F_{\alpha^{(a)}\alpha^{(a)}}^{-1} H'_{\beta\alpha^{(a)}} - H_{\beta\alpha^{(c)}} F_{\alpha^{(c)}\alpha^{(c)}}^{-1} H'_{\beta\alpha^{(c)}}.$$

We will first show that  $H_{\beta\alpha^{(a)}} = \mathbb{E} (u_{w,1}(\beta, \alpha^{(a)}, \alpha^{(c)}) u_{\alpha^{(a)},1}(\alpha^{(a)})')$ .

Following the argumentation outlined in Lawless et al. [5, chapter 7.1.3], it can be shown that  $\mathbb{E}(U_w(\beta, \alpha))$  and thus  $\mathbb{E}(u_{w,1}(\beta, \alpha^{(a)}, \alpha^{(c)}))$  as a function of the true parameter value is always zero. Therefore

$$\nabla_{\alpha^{(a)}} \mathbb{E} (u_{w,1}(\beta, \alpha^{(a)}, \alpha^{(c)})') = 0. \tag{A4}$$

Furthermore, the joint density of  $(\Delta_1, T_1, \bar{A}_1, V_1, \bar{L}_1)$  depends on  $\alpha^{(a)}$  only through the conditional densities  $Pr(A_1(k) = a_1(k) | Y_1(k) = 1, \bar{A}_1(k-1) = \bar{a}_1(k-1), V_1 = v_1, \bar{L}_1(k) = \bar{l}_1(k); \alpha^{(a)})$ ,  $k = 1, \dots, K$ . Using (1) of the main document, we may write the joint density of  $(\Delta_1, Y_1, \bar{A}_1, \bar{L}_1)$  as

$$\begin{aligned}&f(\delta_1, t_1, \bar{a}_1, v_1, \bar{l}_1; \beta, \alpha^{(a)}, \alpha^{(c)}) \\ &= Pr(\bar{A}_1 = \bar{a}_1 | \Delta_1 = \delta_1, T_1 = t_1, V_1 = v_1, \bar{L}_1 = \bar{l}_1; \beta, \alpha^{(a)}, \alpha^{(c)}) \times f(\delta_1, t_1, v_1, \bar{l}_1; \beta, \alpha^{(c)}) \\ &= \prod_{k=1}^K Pr(A_1(k) = a_1(k) | Y_1(k) = 1, \bar{A}_1(k-1) = \bar{a}_1(k-1), V_1 = v_1, \bar{L}_1(k) = \bar{l}_1(k); \alpha^{(a)}) \\ &\quad \times f(\delta_1, t_1, v_1, \bar{l}_1; \beta, \alpha^{(c)}).\end{aligned}$$

The derivative of  $f(\delta_1, t_1, \bar{a}_1, v_1, \bar{l}_1; \beta, \alpha^{(a)}, \alpha^{(c)})$  is then calculated as

$$\begin{aligned} & \nabla_{\alpha^{(a)}} f(\delta_1, t_1, \bar{a}_1, v_1, \bar{l}_1; \beta, \alpha^{(a)}, \alpha^{(c)}) \\ &= \left( \nabla_{\alpha^{(a)}} \prod_{k=1}^K \Pr(A_1(k) = a_1(k) | Y_1(k) = 1, \bar{A}_1(k-1) = \bar{a}_1(k-1), V_1 = v_1, \bar{L}_1(k) = \bar{l}_1(k); \alpha^{(a)}) \right) \\ & \times f(\delta_1, t_1, \bar{l}_1; \beta, \alpha^{(c)}). \end{aligned}$$

Applying the product rule for derivatives, we obtain

$$\begin{aligned} & \nabla_{\alpha^{(a)}} f(\delta_1, t_1, \bar{a}_1, v_1, \bar{l}_1; \beta, \alpha^{(a)}, \alpha^{(c)}) \\ &= \left( \nabla_{\alpha^{(a)}} \log \prod_{k=1}^K \Pr(A_1(k) = a_1(k) | Y_1(k) = 1, \bar{A}_1(k-1) = \bar{a}_1(k-1), V_1 = v_1, \bar{L}_1(k) = \bar{l}_1(k); \alpha^{(a)}) \right) \\ & \times \prod_{k=1}^K \Pr(A_1(k) = a_1(k) | Y_1(k) = 1, \bar{A}_1(k-1) = \bar{a}_1(k-1), V_1 = v_1, \bar{L}_1(k) = \bar{l}_1(k); \alpha^{(a)}) \\ & \times f(\delta_1, t_1, v_1, \bar{l}_1; \beta, \alpha^{(c)}). \end{aligned}$$

Since the first factor is by definition equal to  $u_{\alpha^{(a)},1}(\alpha^{(a)})$  in (4) of the main document and the two other factors simplify to  $f(\delta_1, t_1, \bar{a}_1, v_1, \bar{l}_1; \beta, \alpha^{(a)}, \alpha^{(c)})$ , we get

$$\nabla_{\alpha^{(a)}} f(\delta_1, t_1, \bar{a}_1, v_1, \bar{l}_1; \beta, \alpha^{(a)}, \alpha^{(c)}) = u_{\alpha^{(a)},1}(\alpha^{(a)}) f(\delta_1, t_1, \bar{a}_1, v_1, \bar{l}_1; \beta, \alpha^{(a)}, \alpha^{(c)}) \quad (\text{A5})$$

Finally, under regularity assumption (E), (A4) can be expressed using (A5) as

$$\begin{aligned} 0 &= \nabla_{\alpha^{(a)}} \mathbb{E} \left( u_{w,1}(\beta, \alpha^{(a)}, \alpha^{(c)})' \right) \\ &= \int \nabla_{\alpha^{(a)}} \left( u_{w,1}(\beta, \alpha^{(a)}, \alpha^{(c)})' f(\delta_1, t_1, \bar{a}_1, v_1, \bar{l}_1) \right) d(\delta_1, t_1, \bar{a}_1, v_1, \bar{l}_1) \\ &= \int \nabla_{\alpha^{(a)}} u_{w,1}(\beta, \alpha^{(a)}, \alpha^{(c)})' f(\delta_1, t_1, \bar{a}_1, v_1, \bar{l}_1) d(\delta_1, t_1, \bar{a}_1, v_1, \bar{l}_1) \\ &+ \int u_{\alpha^{(a)},1}(\alpha^{(a)}) u_{w,1}(\beta, \alpha^{(a)}, \alpha^{(c)})' f(\delta_1, t_1, \bar{a}_1, v_1, \bar{l}_1) d(\delta_1, t_1, \bar{a}_1, v_1, \bar{l}_1) \end{aligned}$$

and thus

$$H_{\beta\alpha^{(a)}} = \mathbb{E} \left( \nabla_{\alpha^{(a)}} u_{w,1}(\beta, \alpha^{(a)}, \alpha^{(c)})' \right) = -\mathbb{E} \left( u_{w,1}(\beta, \alpha^{(a)}, \alpha^{(c)}) u_{\alpha^{(a)},1}(\alpha^{(a)})' \right). \quad (\text{A6})$$

Analogously,

$$H_{\beta\alpha^{(c)}} = -\mathbb{E} \left( u_{w,1}(\beta, \alpha^{(a)}, \alpha^{(c)}) u_{\alpha^{(c)},1}(\alpha^{(c)})' \right), \quad (\text{A7})$$

$$H_{\alpha^{(a)}\alpha^{(a)}} = \mathbb{E} \left( \nabla_{\alpha^{(a)}} u_{\alpha^{(a)},1}(\alpha^{(a)})' \right) = -\mathbb{E} \left( u_{\alpha^{(a)},1}(\alpha^{(a)}) u_{\alpha^{(a)},1}(\alpha^{(a)})' \right) \quad (\text{A8})$$

and

$$H_{\alpha^{(c)}\alpha^{(c)}} = -\mathbb{E} \left( u_{\alpha^{(c)},1}(\alpha^{(c)}) u_{\alpha^{(c)},1}(\alpha^{(c)})' \right). \quad (\text{A9})$$

Furthermore, since  $u_{\alpha^{(a)},1}(\alpha^{(a)})$  does not depend on  $\alpha_c$ ,

$$\mathbb{E} \left( u_{\alpha^{(a)},1}(\alpha^{(a)}) u_{\alpha^{(c)},1}(\alpha^{(c)})' \right) = \mathbb{E} \left( \nabla_{\alpha^{(c)}} u_{\alpha^{(a)},1}(\alpha^{(a)}) \right) = \mathbb{E}(0) = 0. \quad (\text{A10})$$

Plugging (A6), (A7), (A8), (A9) and (A10) into (A3) yields

$$\begin{aligned} \text{Var}(B) &= \mathbb{E} \left( \tilde{u}_{w,1}(\beta, \alpha^{(a)}, \alpha^{(c)}) \tilde{u}_{w,1}(\beta, \alpha^{(a)}, \alpha^{(c)})' \right) \\ &\quad + H_{\beta\alpha^{(a)}} \mathbb{E} \left( u_{\alpha^{(a)},1}(\alpha^{(a)}) u_{\alpha^{(a)},1}(\alpha^{(a)})' \right)^{-1} H'_{\beta\alpha^{(a)}} \\ &\quad + H_{\beta\alpha^{(c)}} \mathbb{E} \left( u_{\alpha^{(c)},1}(\alpha^{(c)}) u_{\alpha^{(c)},1}(\alpha^{(c)})' \right)^{-1} H'_{\beta\alpha^{(c)}} \\ &\quad - 2H_{\beta\alpha^{(a)}} \mathbb{E} \left( u_{\alpha^{(a)},1}(\alpha^{(a)}) u_{\alpha^{(a)},1}(\alpha^{(a)})' \right)^{-1} H'_{\beta\alpha^{(a)}} \\ &\quad - 2H_{\beta\alpha^{(c)}} \mathbb{E} \left( u_{\alpha^{(c)},1}(\alpha^{(c)}) u_{\alpha^{(c)},1}(\alpha^{(c)})' \right)^{-1} H'_{\beta\alpha^{(c)}}, \end{aligned}$$

This simplifies to

$$\text{Var}(B) = F_\beta - H_{\beta\alpha^{(a)}} F_{\alpha^{(a)}}^{-1} H'_{\beta\alpha^{(a)}} - H_{\beta\alpha^{(c)}} F_{\alpha^{(c)}}^{-1} H'_{\beta\alpha^{(c)}},$$

which completes the proof.

## References

1. Ali RA, Ali MA, Wei Z. On computing standard errors for marginal structural Cox models. *Lifetime Data Analysis* 2014; **20**(1):106–131.
2. Robins JM, Rotnitzky A, Zhao LP. Analysis of semiparametric regression models for repeated outcomes in the presence of missing data. *Journal of the American Statistical Association* 1995; **90**(429):106–121.
3. Lin DY, Wei LJ. The robust inference for the Cox proportional hazards model. *Journal of the American Statistical Association* 1989; **84**(408):1074–1078.
4. Anderson PK, Gill RD. Cox's regression model for counting processes: a large sample study. *The Annals of Statistics* 1982; **10**(4):1100–1120.
5. Lawless JF. *Statistical Models and Methods for Lifetime Data* (2nd edn). Wiley: Hoboken, New Jersey, 2011.
